# Supplementary material for: Single-Cell Analysis of Aneurysmal Aortic Tissue in Patients with Marfan Syndrome Reveals Dysfunctional TGF-β Signaling
Source: MDPI journal article supplement (doi:10.3390/genes13010095), 2021-12-30
Supplement: s1 [file s1]

## **SUPPLEMENTAL MATERIAL**

### **Single-cell Analysis of Aneurysmal Aortic Tissue in Patients With Marfan Syndrome Reveals Altered Smooth Muscle Cell Differentiation and Dysfunctional TGF- $\beta$ Signaling**

Ashley Dawson, MD, Yanming Li, PhD, Pingping Ren, MD, PhD, Hernan G. Vasquez, PhD, Chen Zhang, MD, Waleed Ageedi, MD, Alon R. Azares, MS, Aladdein Mattar, MD, Mary Burchett Sheppard, MD, Hong S. Lu, MD, PhD, Joseph S. Coselli, MD, Lisa A. Cassis, PhD, Alan Daugherty, PhD, Ying H. Shen, MD, PhD, Scott A. LeMaire, MD

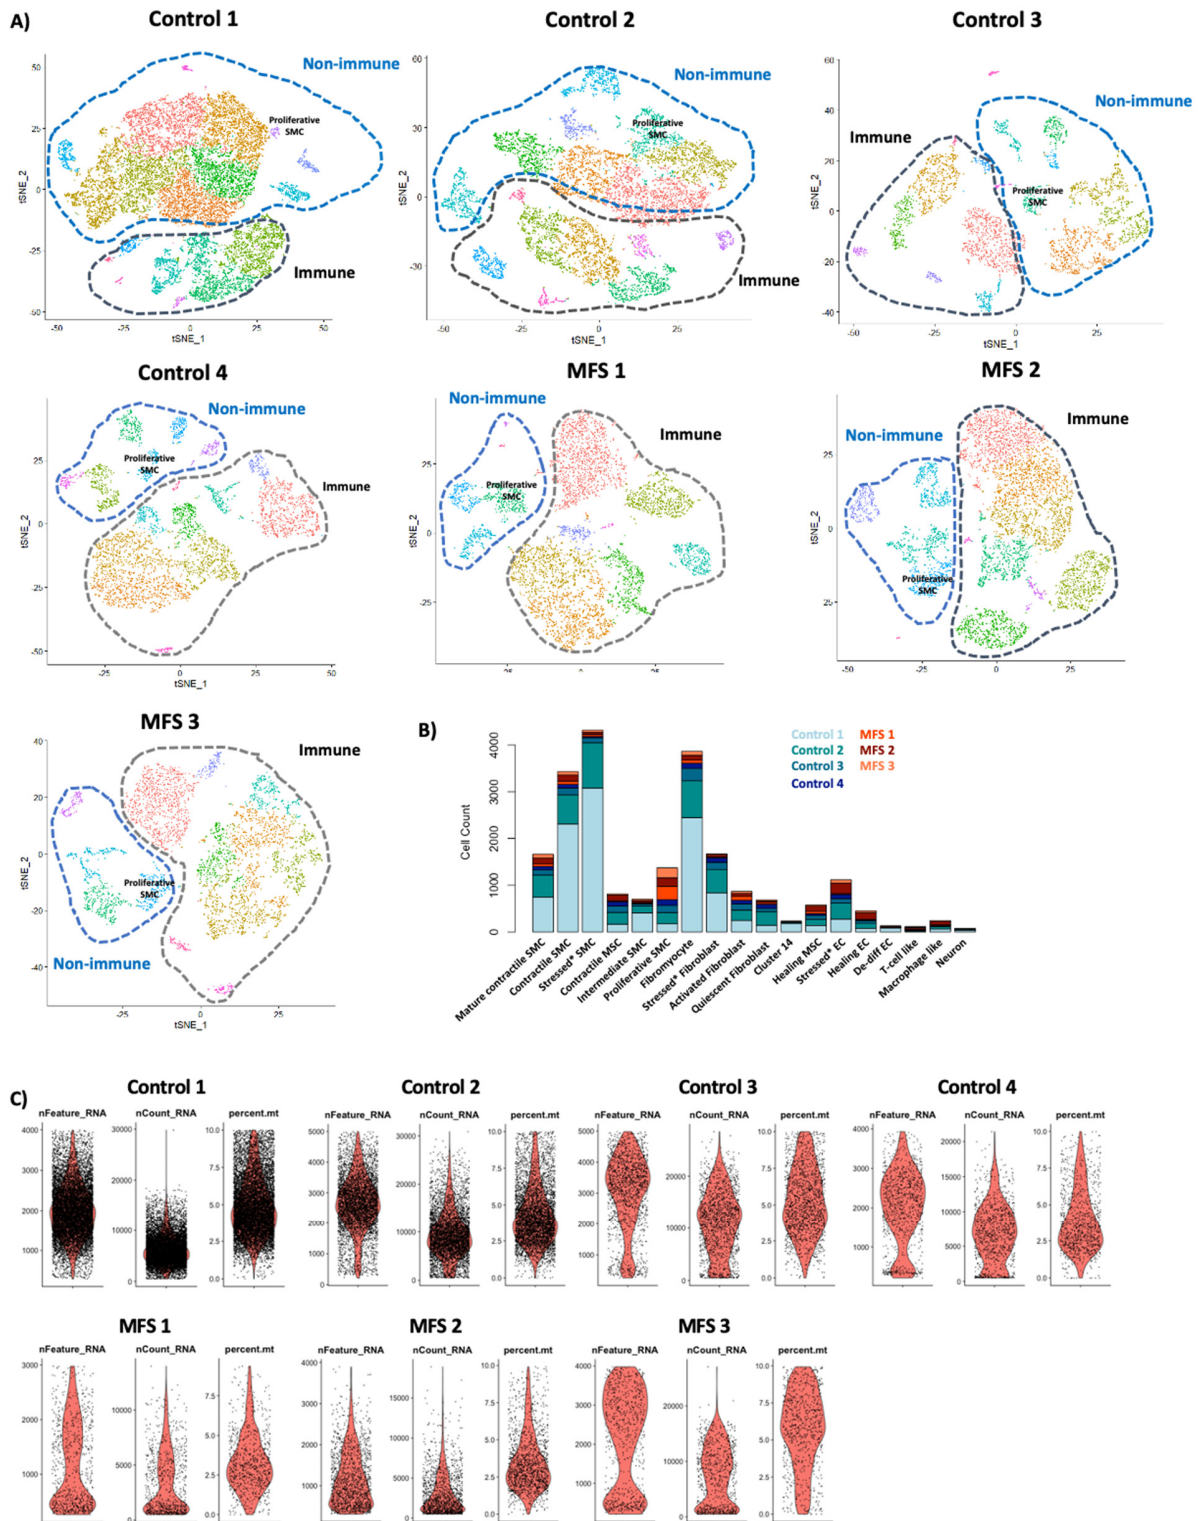

**Figure S1. Individual sample data.** A, Individual tSNE plots for each sample. The non-immune cells were identified and extracted. The de-differentiated, proliferative SMCs

are indicated in each sample. **B**, Cell count in each cluster from each sample. Control tissues had increased numbers of SMCs compared to MFS tissues. **c**, Quality control measures including the distribution of features (genes), RNA counts, and percent mitochondria genes (percent.mt) for the non-immune cells of each sample.

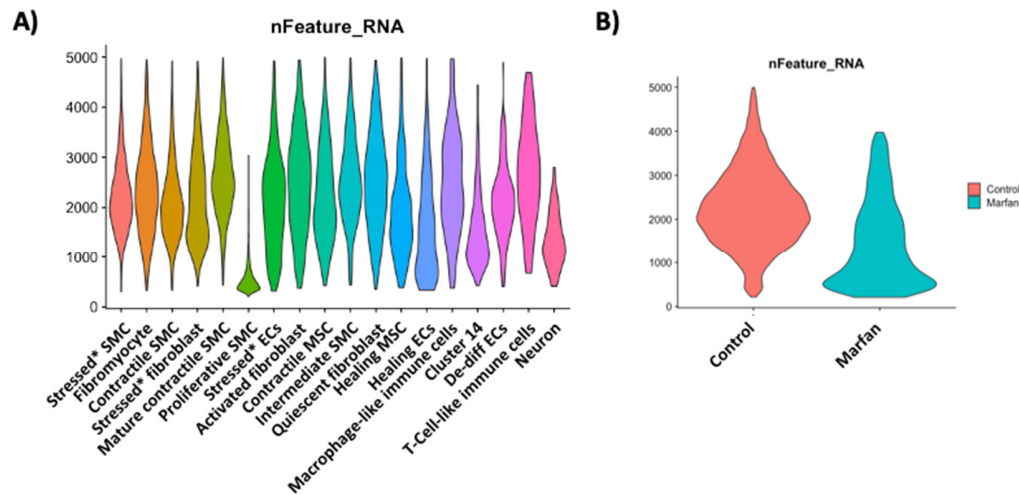

**Figure S2. Overall gene expression levels in non-immune cells.** **A**, De-differentiated, proliferative SMCs have a relatively low level of gene expression compared to other clusters. **B**, Gene expression levels are lower in Marfan samples in general.

A)

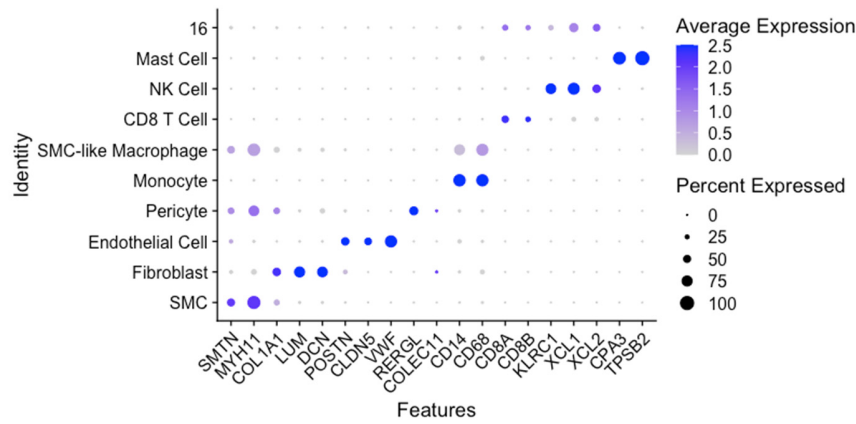

B)

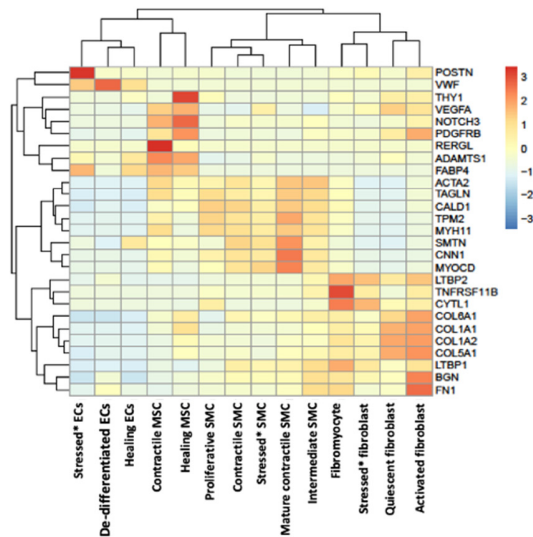

**Figure S3: General cluster identification in immune and non-immune cells in combined samples.** A, Common marker genes were used to identify clusters. B, Correlation analysis showing similar types of non-immune cells in combined MFS and control tissues based on gene expression patterns.

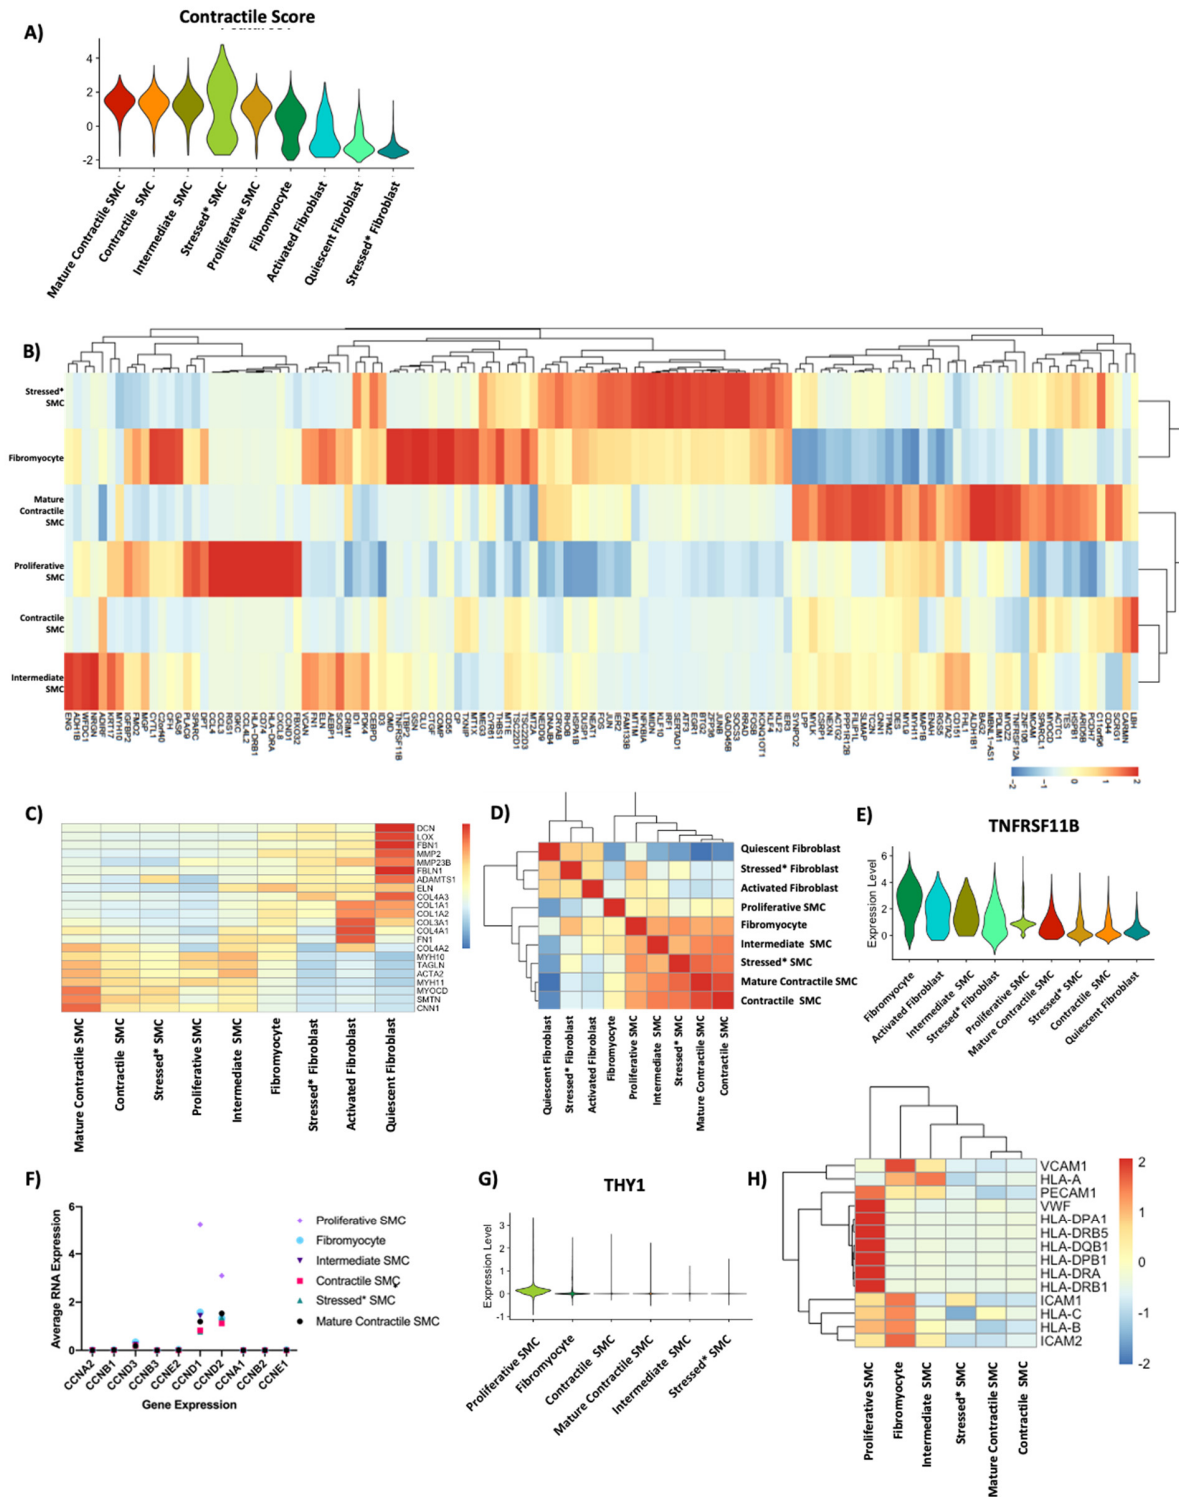

**Figure S4. Identification of SMC phenotype.** Heatmaps are scaled by row. **A**, Contractile composite scores of RNA expression of *SMTN*, *MHY11*, and *CNN1* used to identify the mature contractile SMCs. Clusters are ordered from highest to lowest

expression from left to right. **B**, Top 20 upregulated and downregulated genes within each SMC-like cluster compared to mature contractile SMCs. **C**, Expression of functional genes involved in contraction and ECM production in SMCs and fibroblasts. **D**, Correlation analysis between fibroblasts and SMCs. **E**, Expression of *TNFRSF11B*, a marker for fibromyocytes, in fibroblasts and SMCs. **F**, Expression of cyclin genes. **G**, Expression of THY-1 (CD-90), a marker of stem cell-like cells. **H**, Expression of inflammatory genes including those for HLA-I and HLA-II and for interleukins.

\*Stressed cells likely represent technical artifact.

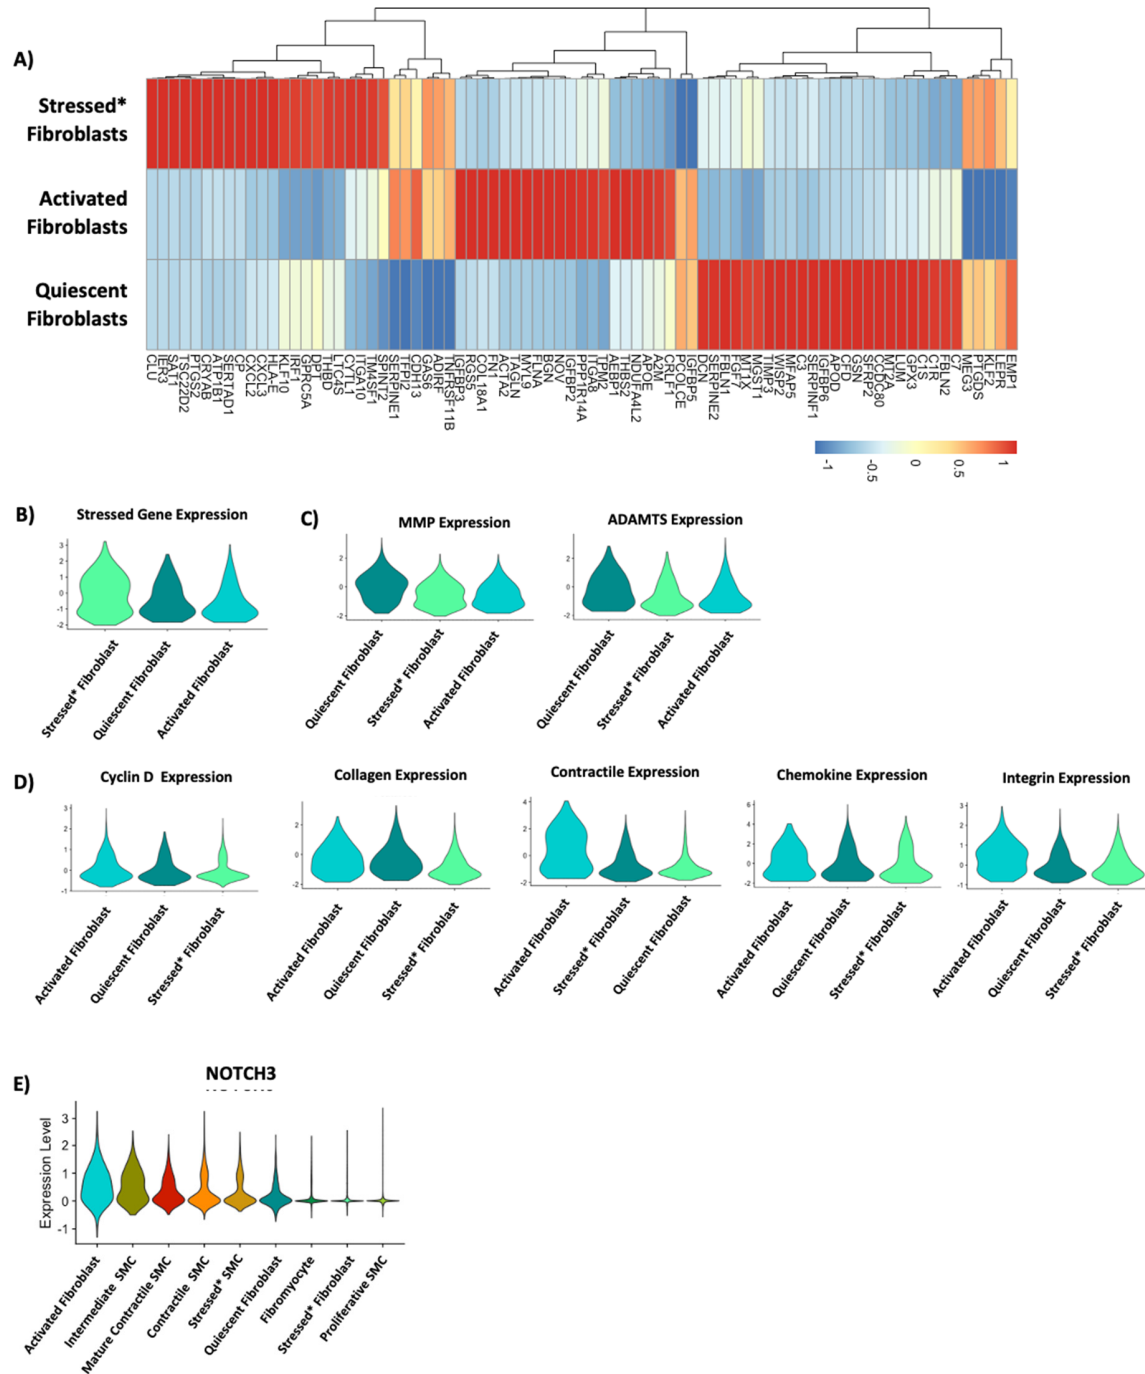

**Figure S5. Identification of fibroblast phenotype.** **A**, Top 20 upregulated and downregulated genes between fibroblast clusters. Heatmap is scaled by row. **B**, Stress response genes area highest in the stressed fibroblasts (\*consistent with technical artifact secondary to tissue processing). **C**, Matrix metalloproteinase (MMP) and ADAMTS gene expression is highest in quiescent fibroblasts. **D**, Expression of cyclin D, collagen, contractile, chemokine, and integrin genes are highest in activated fibroblasts.

E, Expression of NOTCH3, a gene involved in modulation of SMC phenotype and angiogenesis and cell differentiation in the injury response, is highest in activated fibroblasts.



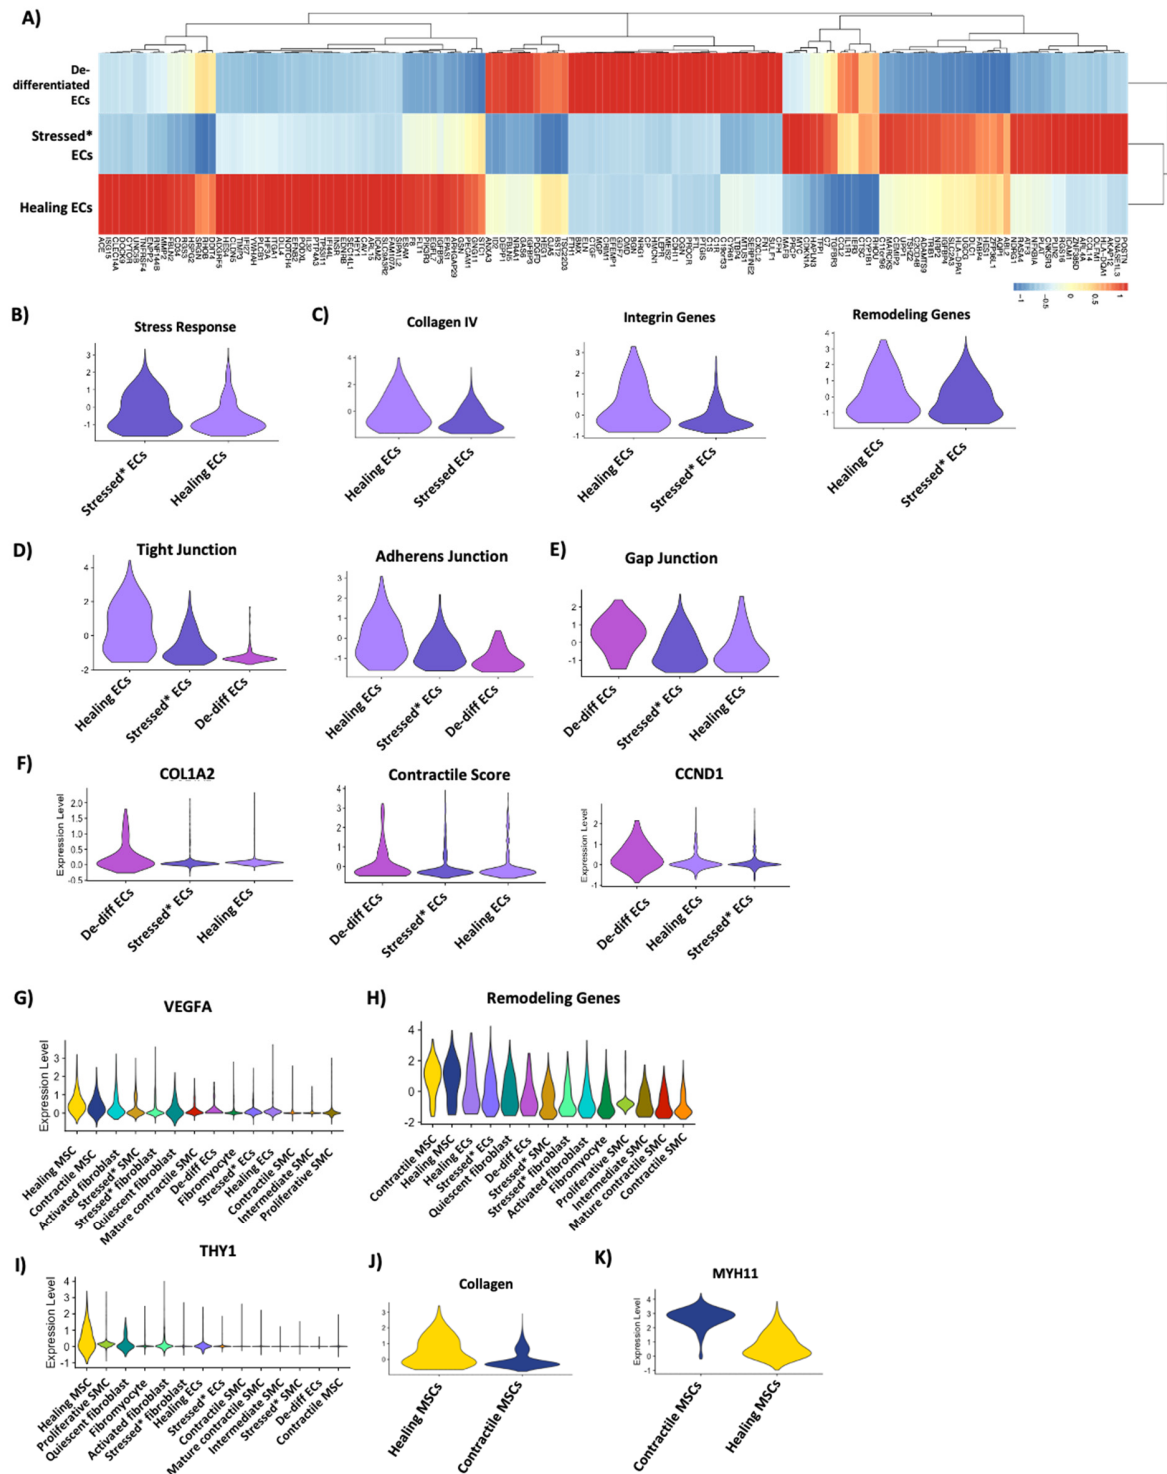

**Figure S6. Identification of endothelial cell and mesenchymal stem cell phenotype.** **A**, Top 20 upregulated and downregulated genes between each endothelial cell (EC) cluster. Heatmap is scaled by row. **B**, Higher composite score of stress response genes

ATF3, JUN, JUNB, FOS, and FOSB in the stressed ECs, (\*consistent with technical artifact secondary to tissue processing). **C**, Higher expression of collagen, integrin, and remodeling genes in healing ECs. **D**, Healing ECs most involved in tight and adherens junctions. **E**, De-differentiated ECs with higher gap junction gene expression. **F**, De-differentiated ECs with higher collagen I (COL1A2), contractile module score, and cyclin D1 (CCND1) expression. **G**, Overall highest composite score of vascular endothelial growth factor-A (VEGFA) in the mesenchymal stem cell (MSC) clusters. **H**, Overall highest expression of remodeling genes in the MSC clusters. **I**, Overall highest expression of THY1 in healing MSCs. **J**, Higher composite score of collagen genes in healing MSCs. **K**, Higher composite score of the contractile gene MYH11 in contractile MSCs.

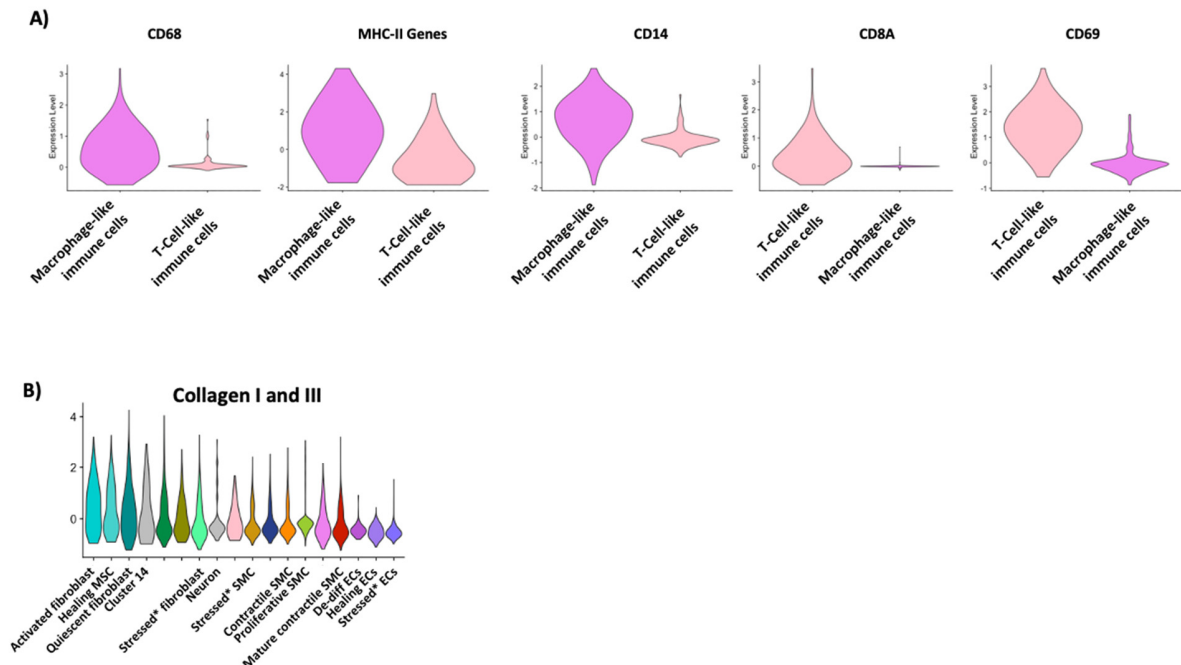

**Figure S7. Identification of immune-like non-immune cells.** **A**, Higher expression levels of macrophage markers in the macrophage-like non-immune cells showing CD68, antigen-presenting MHC-II genes, and CD14. Higher expression of T-cell genes in the T-cell-like non-immune cells showing CD8A and CD69. **B**, Collagen I and III expression in immune-like non-immune cells is comparable to smooth muscle cells (SMCs) and higher than that in endothelial cells (ECs).

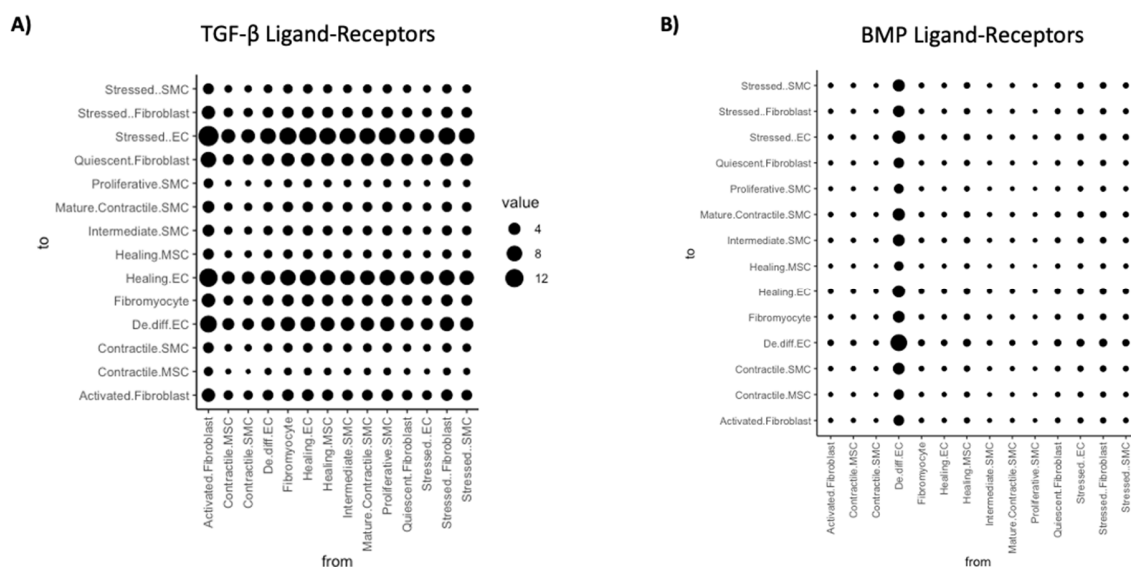

**Figure S8. Cell-cell signaling within the TGF- $\beta$  pathway.** **A**, Junctional analysis of TGF- $\beta$  ligands and receptors. Ligands include *TGFB1*, *TGFB2*, *TGFB3*. Receptors include *TGFBR1*, *TGFBR2*, *TGFBR3*, *ACVRL1*. **B**, Junctional analysis of BMP ligands and receptors. BMP ligands include BMP 2-7 and receptors include *BMPR1A*, *BMPR1B*, *BMPR2*, *ACVR1B*, *ACVRL1*, *ACVR2A*, *ACVR2B*.

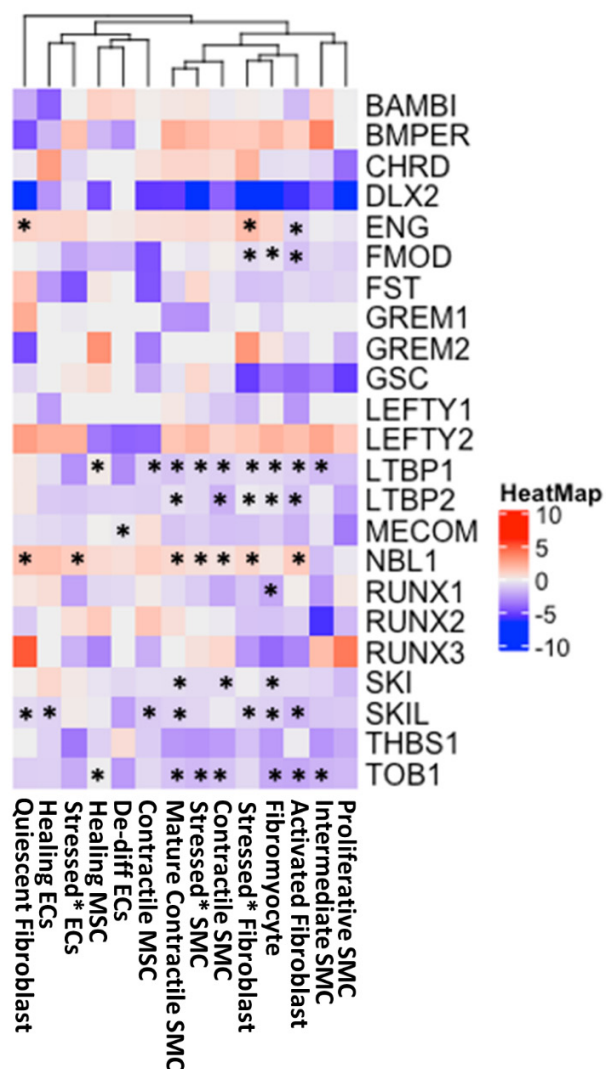

**Figure S9. Differential expression of genes involved in the control of TGF- $\beta$  signaling.** Data are visualized as log<sub>2</sub>FC in MFS compared to control tissues. \*Clusters with significant differential expression (adjusted p value < 0.05). EC, endothelial cells; MSC, mesenchymal stem cells; SMC, smooth muscle cells.

**Table S1.** Patient sample information

| Sample                | Age | Sex | Race    | Ethnicity       | Aortic Root Diameter (cm) | Asc Aortic Diameter (cm) | Smoking History    | Medical History           | Genetic History                                                                                  |
|-----------------------|-----|-----|---------|-----------------|---------------------------|--------------------------|--------------------|---------------------------|--------------------------------------------------------------------------------------------------|
| Control 1 (Recipient) | 47  | M   | Unknown | Unknown         | N/A                       | N/A                      | Unknown            | NICM, pHTN, DM, HTN, ESRD | N/A                                                                                              |
| Control 2 (Donor)     | 44  | M   | Unknown | Unknown         | N/A                       | N/A                      | Past               | DM                        | N/A                                                                                              |
| Control 3 (Donor)     | 38  | M   | White   | Non-Hispanic    | N/A                       | N/A                      | Yes, 20 pack years | None                      | N/A                                                                                              |
| Control 4 (Donor)     | 23  | M   | White   | Non-Hispanic    | N/A                       | N/A                      | Never              | None                      | N/A                                                                                              |
| MFS 1                 | 40  | M   | White   | Non-Hispanic    | 4.6, previously repaired  | 5.3                      | Past               | CHF                       | Diagnosed with MFS at 19 years old at OSH, kyphosis, scoliosis. FHx: brother and father with MFS |
| MFS 2                 | 23  | F   | White   | Non-Hispanic    | 4.2                       | 3                        | Past               | HTN, CHF                  | Diagnosed with MFS at 5 years old at OSH, pectus excavatum. FHx: mother, cousin with MFS         |
| MFS 3                 | 38  | F   | White   | Hispanic/Latino | 6.1                       | 3.6                      | Never              | HLD, HTN, CHF             | FHx: At least two brothers with MFS, one brother with pathologic variant on <i>FBN1</i>          |

Ascending (AS), congestive heart failure (CHF), diabetes mellitus (DM), end-stage renal disease (ESRD), family history (FHx), hyperlipidemia (HLD), hypertension (HTN), Marfan syndrome (MFS), nonischemic cardiomyopathy (NICM), outside hospital (OSH), pulmonary hypertension (pHTN).

**Table S2.** Antibodies used in immunofluorescence

| <b>Antibody</b>       | <b>Company</b> | <b>Catalog Number</b> |
|-----------------------|----------------|-----------------------|
| TGFB1                 | Abcam          | ab92486               |
| TGF-beta receptor II  | Cell Signaling | 79424S                |
| Cyclin D1             | Cell Signaling | 2978S                 |
| Anti-TAGLN/Transgelin | Abcam          | ab10135               |

**Table S3.** Genes associated with *TGFB1* in “activated fibroblasts”

| Gene          | Correlation | Function                                 |
|---------------|-------------|------------------------------------------|
| <i>TGFB1</i>  | 1           |                                          |
| <i>MMP11</i>  | 0.272426    | Remodeling                               |
| <i>PTP4A3</i> | 0.246508    | Proliferation                            |
| <i>PLXDC1</i> | 0.24615     | Angiogenesis                             |
| <i>SPARC</i>  | 0.242422    | Extracellular matrix structure           |
| <i>BRK1</i>   | 0.222364    | Endocytosis trafficking                  |
| <i>RGS5</i>   | 0.218113    | Hypoxia inducible, endothelial apoptosis |
| <i>DERL3</i>  | 0.216915    | Degradation of misfolded proteins        |
| <i>TGFB1</i>  | 0.214094    | Proliferation                            |
| <i>EGFL7</i>  | 0.212958    | Proliferation, vasculogenesis            |
| <i>CPE</i>    | 0.211162    | Hormone/signaling secretion              |

**Table S4.** Genes associated with *TGFB1* in “quiescent fibroblasts”

| Gene          | Correlation | Function                            |
|---------------|-------------|-------------------------------------|
| <i>TGFB1</i>  | 1           |                                     |
| <i>ZCRB1</i>  | 0.187697    | RNA splicing                        |
| <i>TMX1</i>   | 0.186799    | ER protein folding, redox reactions |
| <i>GSDMD</i>  | 0.185679    | Pyroptosis                          |
| <i>WDR54</i>  | 0.18448     | Regulation of ERK signaling         |
| <i>TGFB1</i>  | 0.182359    | Proliferation                       |
| <i>TAGLN2</i> | 0.180823    | Smooth muscle contraction           |
| <i>OAZ2</i>   | 0.179703    | Induces inhibitory SMAD6            |
| <i>EIF3L</i>  | 0.177385    | Protein synthesis                   |
| <i>HEYL</i>   | 0.176706    | Transcription factor                |
| <i>RPL13A</i> | 0.176562    | Ribosomal protein                   |

Endoplasmic reticulum (ER).
